# Supplementary material for: Puerarin: A Potential Therapeutic for Colon Adenocarcinoma (COAD) Patients Suffering From SARS-CoV-2 Infection
Source: Front Pharmacol. 2022 May 23;13:921517. doi: 10.3389/fphar.2022.921517 (PMC9168431; doi:10.3389/fphar.2022.921517)
Supplement: Supplementary file 7 [file Table7.XLSX]

## Sheet: Sheet1
ID	Description	GeneRatio	BgRatio	pvalue	p.adjust	qvalue	geneID	Count
hsa05417	Lipid and atherosclerosis	18/40	215/8142	1.29857e-18	2.94774e-16	9.29499e-17		18
hsa05161	Hepatitis B	16/40	162/8142	1.18826e-17	1.34867e-15	4.25271e-16		16
hsa04210	Apoptosis	15/40	136/8142	2.82879e-17	2.14045e-15	6.74938e-16		15
hsa04933	AGE-RAGE signaling pathway in diabetic complications	13/40	100/8142	5.94309e-16	3.3727e-14	1.0635e-14		13
hsa05145	Toxoplasmosis	13/40	112/8142	2.73551e-15	1.24192e-13	3.91609e-14		13
hsa04657	IL-17 signaling pathway	12/40	94/8142	1.16797e-14	4.41882e-13	1.39337e-13		12
hsa04668	TNF signaling pathway	12/40	112/8142	1.0196e-13	3.30642e-12	1.0426e-12		12
hsa05167	Kaposi sarcoma-associated herpesvirus infection	14/40	194/8142	1.60309e-13	4.29827e-12	1.35535e-12		14
hsa05210	Colorectal cancer	11/40	86/8142	1.70416e-13	4.29827e-12	1.35535e-12		11
hsa05170	Human immunodeficiency virus 1 infection	14/40	212/8142	5.47914e-13	1.17984e-11	3.72034e-12		14
hsa04926	Relaxin signaling pathway	12/40	129/8142	5.71728e-13	1.17984e-11	3.72034e-12		12
hsa01522	Endocrine resistance	11/40	98/8142	7.502e-13	1.41913e-11	4.47488e-12		11
hsa05208	Chemical carcinogenesis - reactive oxygen species	14/40	223/8142	1.09974e-12	1.88297e-11	5.93748e-12		14
hsa05142	Chagas disease	11/40	102/8142	1.17718e-12	1.88297e-11	5.93748e-12		11
hsa05152	Tuberculosis	13/40	180/8142	1.39633e-12	1.88297e-11	5.93748e-12		13
hsa05162	Measles	12/40	139/8142	1.41015e-12	1.88297e-11	5.93748e-12		12
hsa05418	Fluid shear stress and atherosclerosis	12/40	139/8142	1.41015e-12	1.88297e-11	5.93748e-12		12
hsa04066	HIF-1 signaling pathway	11/40	109/8142	2.47748e-12	3.12438e-11	9.85198e-12		11
hsa04722	Neurotrophin signaling pathway	11/40	119/8142	6.58589e-12	7.8684e-11	2.48111e-11		11
hsa05215	Prostate cancer	10/40	97/8142	2.26591e-11	2.5718e-10	8.10956e-11		10
hsa04620	Toll-like receptor signaling pathway	10/40	104/8142	4.59251e-11	4.55394e-10	1.43597e-10		10
hsa04625	C-type lectin receptor signaling pathway	10/40	104/8142	4.59251e-11	4.55394e-10	1.43597e-10		10
hsa04936	Alcoholic liver disease	11/40	142/8142	4.61412e-11	4.55394e-10	1.43597e-10		11
hsa01524	Platinum drug resistance	9/40	73/8142	4.93581e-11	4.66846e-10	1.47208e-10		9
hsa05133	Pertussis	9/40	76/8142	7.16859e-11	6.50908e-10	2.05248e-10		9
hsa05140	Leishmaniasis	9/40	77/8142	8.08939e-11	7.06266e-10	2.22704e-10		9
hsa05132	Salmonella infection	13/40	249/8142	8.64845e-11	7.27111e-10	2.29277e-10		13
hsa05160	Hepatitis C	11/40	157/8142	1.37747e-10	1.11673e-09	3.52134e-10		11
hsa05207	Chemical carcinogenesis - receptor activation	12/40	212/8142	2.09421e-10	1.63926e-09	5.169e-10		12
hsa05163	Human cytomegalovirus infection	12/40	225/8142	4.17776e-10	3.16118e-09	9.968e-10		12
hsa05135	Yersinia infection	10/40	137/8142	7.21397e-10	5.28249e-09	1.66571e-09		10
hsa04915	Estrogen signaling pathway	10/40	138/8142	7.7512e-10	5.49851e-09	1.73382e-09		10
hsa04917	Prolactin signaling pathway	8/40	70/8142	1.22346e-09	8.13893e-09	2.56641e-09		8
hsa05131	Shigellosis	12/40	247/8142	1.22397e-09	8.13893e-09	2.56641e-09		12
hsa04660	T cell receptor signaling pathway	9/40	104/8142	1.2549e-09	8.13893e-09	2.56641e-09		9
hsa05130	Pathogenic Escherichia coli infection	11/40	197/8142	1.57673e-09	9.94219e-09	3.13503e-09		11
hsa05212	Pancreatic cancer	8/40	76/8142	2.39266e-09	1.41257e-08	4.4542e-09		8
hsa05205	Proteoglycans in cancer	11/40	205/8142	2.40576e-09	1.41257e-08	4.4542e-09		11
hsa04932	Non-alcoholic fatty liver disease	10/40	155/8142	2.42688e-09	1.41257e-08	4.4542e-09		10
hsa01521	EGFR tyrosine kinase inhibitor resistance	8/40	79/8142	3.2757e-09	1.85896e-08	5.86178e-09		8
hsa04071	Sphingolipid signaling pathway	9/40	119/8142	4.19419e-09	2.32215e-08	7.32233e-09		9
hsa05164	Influenza A	10/40	171/8142	6.31433e-09	3.41275e-08	1.07613e-08		10
hsa04215	Apoptosis - multiple species	6/40	32/8142	7.84475e-09	4.13357e-08	1.30342e-08		6
hsa04380	Osteoclast differentiation	9/40	128/8142	8.0122e-09	4.13357e-08	1.30342e-08		9
hsa05235	PD-L1 expression and PD-1 checkpoint pathway in cancer	8/40	89/8142	8.56092e-09	4.31851e-08	1.36174e-08		8
hsa05222	Small cell lung cancer	8/40	92/8142	1.11643e-08	5.43784e-08	1.71469e-08		8
hsa04370	VEGF signaling pathway	7/40	59/8142	1.1259e-08	5.43784e-08	1.71469e-08		7
hsa04621	NOD-like receptor signaling pathway	10/40	184/8142	1.2814e-08	6.05998e-08	1.91087e-08		10
hsa05165	Human papillomavirus infection	12/40	331/8142	3.34479e-08	1.54952e-07	4.88605e-08		12
hsa04931	Insulin resistance	8/40	108/8142	3.99078e-08	1.81181e-07	5.71312e-08		8
hsa05220	Chronic myeloid leukemia	7/40	76/8142	6.7906e-08	3.02248e-07	9.53067e-08		7
hsa04662	B cell receptor signaling pathway	7/40	82/8142	1.15586e-07	5.04578e-07	1.59106e-07		7
hsa05010	Alzheimer disease	12/40	384/8142	1.7175e-07	7.3561e-07	2.31957e-07		12
hsa05022	Pathways of neurodegeneration - multiple diseases	13/40	476/8142	2.22116e-07	9.33711e-07	2.94423e-07		13
hsa05134	Legionellosis	6/40	57/8142	2.87156e-07	1.18517e-06	3.73715e-07		6
hsa05213	Endometrial cancer	6/40	58/8142	3.19141e-07	1.27194e-06	4.01076e-07		6
hsa04140	Autophagy - animal	8/40	141/8142	3.19387e-07	1.27194e-06	4.01076e-07		8
hsa05169	Epstein-Barr virus infection	9/40	202/8142	4.18523e-07	1.63801e-06	5.16507e-07		9
hsa05415	Diabetic cardiomyopathy	9/40	203/8142	4.36414e-07	1.67909e-06	5.29459e-07		9
hsa04064	NF-kappa B signaling pathway	7/40	104/8142	5.97066e-07	2.2589e-06	7.1229e-07		7
hsa04659	Th17 cell differentiation	7/40	108/8142	7.72565e-07	2.87495e-06	9.06547e-07		7
hsa05211	Renal cell carcinoma	6/40	69/8142	9.08566e-07	3.32652e-06	1.04894e-06		6
hsa05166	Human T-cell leukemia virus 1 infection	9/40	222/8142	9.281e-07	3.34411e-06	1.05448e-06		9
hsa05225	Hepatocellular carcinoma	8/40	168/8142	1.21871e-06	4.32263e-06	1.36304e-06		8
hsa05219	Bladder cancer	5/40	41/8142	1.45499e-06	5.08127e-06	1.60225e-06		5
hsa04919	Thyroid hormone signaling pathway	7/40	121/8142	1.67e-06	5.74377e-06	1.81116e-06		7
hsa04930	Type II diabetes mellitus	5/40	46/8142	2.61402e-06	8.85646e-06	2.79267e-06		5
hsa04012	ErbB signaling pathway	6/40	85/8142	3.12942e-06	1.04467e-05	3.29412e-06		6
hsa04062	Chemokine signaling pathway	8/40	192/8142	3.32836e-06	1.09498e-05	3.45276e-06		8
hsa04510	Focal adhesion	8/40	201/8142	4.68211e-06	1.51834e-05	4.78772e-06		8
hsa04658	Th1 and Th2 cell differentiation	6/40	92/8142	4.97538e-06	1.59072e-05	5.01595e-06		6
hsa05020	Prion disease	9/40	273/8142	5.15085e-06	1.62395e-05	5.12073e-06		9
hsa05203	Viral carcinogenesis	8/40	204/8142	5.22644e-06	1.62521e-05	5.1247e-06		8
hsa04151	PI3K-Akt signaling pathway	10/40	354/8142	5.60437e-06	1.71918e-05	5.42101e-06		10
hsa05224	Breast cancer	7/40	147/8142	6.13505e-06	1.85688e-05	5.85521e-06		7
hsa05226	Gastric cancer	7/40	149/8142	6.70886e-06	2.00383e-05	6.3186e-06		7
hsa05231	Choline metabolism in cancer	6/40	98/8142	7.18773e-06	2.11898e-05	6.68169e-06		6
hsa04010	MAPK signaling pathway	9/40	294/8142	9.41312e-06	2.71142e-05	8.54982e-06		9
hsa04024	cAMP signaling pathway	8/40	221/8142	9.43623e-06	2.71142e-05	8.54982e-06		8
hsa04217	Necroptosis	7/40	159/8142	1.02928e-05	2.92057e-05	9.20932e-06		7
hsa05171	Coronavirus disease - COVID-19	8/40	232/8142	1.34668e-05	3.77404e-05	1.19005e-05		8
hsa05206	MicroRNAs in cancer	9/40	310/8142	1.44298e-05	3.9946e-05	1.2596e-05		9
hsa04725	Cholinergic synapse	6/40	113/8142	1.63458e-05	4.47048e-05	1.40966e-05		6
hsa05221	Acute myeloid leukemia	5/40	67/8142	1.70794e-05	4.6155e-05	1.45538e-05		5
hsa04664	Fc epsilon RI signaling pathway	5/40	68/8142	1.83688e-05	4.90555e-05	1.54685e-05		5
hsa04920	Adipocytokine signaling pathway	5/40	69/8142	1.97329e-05	5.20856e-05	1.64239e-05		5
hsa04622	RIG-I-like receptor signaling pathway	5/40	70/8142	2.11746e-05	5.52487e-05	1.74213e-05		5
hsa04935	Growth hormone synthesis, secretion and action	6/40	119/8142	2.19705e-05	5.66739e-05	1.78707e-05		6
hsa05218	Melanoma	5/40	72/8142	2.43035e-05	6.12989e-05	1.93291e-05		5
hsa05223	Non-small cell lung cancer	5/40	72/8142	2.43035e-05	6.12989e-05	1.93291e-05		5
hsa05216	Thyroid cancer	4/40	37/8142	2.93478e-05	7.32081e-05	2.30844e-05		4
hsa04910	Insulin signaling pathway	6/40	137/8142	4.87686e-05	0.000120331	3.79435e-05		6
hsa04912	GnRH signaling pathway	5/40	93/8142	8.37186e-05	0.000204345	6.44353e-05		5
hsa04014	Ras signaling pathway	7/40	232/8142	0.000116383	0.000281053	8.86233e-05		7
hsa05146	Amoebiasis	5/40	102/8142	0.000129906	0.000310406	9.7879e-05		5
hsa00220	Arginine biosynthesis	3/40	22/8142	0.00015858	0.000374974	0.000118239		3
hsa05120	Epithelial cell signaling in Helicobacter pylori infection	4/40	70/8142	0.000362552	0.000839788	0.000264807		4
hsa05230	Central carbon metabolism in cancer	4/40	70/8142	0.000362552	0.000839788	0.000264807		4
hsa04115	p53 signaling pathway	4/40	73/8142	0.000425841	0.000976424	0.000307892		4
hsa05214	Glioma	4/40	75/8142	0.000472189	0.00107187	0.000337988		4
hsa05168	Herpes simplex virus 1 infection	9/40	495/8142	0.000529114	0.0011892	0.000374984		9
hsa04371	Apelin signaling pathway	5/40	139/8142	0.000549107	0.00122203	0.000385339		5
hsa04921	Oxytocin signaling pathway	5/40	154/8142	0.000874822	0.00192801	0.00060795		5
hsa04211	Longevity regulating pathway	4/40	89/8142	0.000902797	0.00197053	0.000621358		4
hsa04150	mTOR signaling pathway	5/40	156/8142	0.000927239	0.0020046	0.000632103		5
hsa05323	Rheumatoid arthritis	4/40	93/8142	0.00106445	0.00227952	0.000718793		4
hsa04666	Fc gamma R-mediated phagocytosis	4/40	97/8142	0.00124548	0.00264227	0.000833176		4
hsa04022	cGMP-PKG signaling pathway	5/40	167/8142	0.00125859	0.00264536	0.00083415		5
hsa04914	Progesterone-mediated oocyte maturation	4/40	102/8142	0.00150085	0.00312563	0.000985592		4
hsa04928	Parathyroid hormone synthesis, secretion and action	4/40	106/8142	0.0017299	0.00356989	0.00112568		4
hsa00330	Arginine and proline metabolism	3/40	51/8142	0.00194307	0.00397366	0.001253		3
hsa04613	Neutrophil extracellular trap formation	5/40	190/8142	0.00222561	0.00451083	0.00142238		5
hsa04726	Serotonergic synapse	4/40	115/8142	0.00233227	0.00468518	0.00147736		4
hsa04611	Platelet activation	4/40	124/8142	0.00306608	0.00610527	0.00192515		4
hsa04929	GnRH secretion	3/40	64/8142	0.00371984	0.00724876	0.00228572		3
hsa04068	FoxO signaling pathway	4/40	131/8142	0.00373614	0.00724876	0.00228572		4
hsa04650	Natural killer cell mediated cytotoxicity	4/40	131/8142	0.00373614	0.00724876	0.00228572		4
hsa04728	Dopaminergic synapse	4/40	132/8142	0.00383936	0.00738589	0.00232896		4
hsa05321	Inflammatory bowel disease	3/40	65/8142	0.00388665	0.00741403	0.00233783		3
hsa05204	Chemical carcinogenesis - DNA adducts	3/40	69/8142	0.00459932	0.00870038	0.00274345		3
hsa04550	Signaling pathways regulating pluripotency of stem cells	4/40	143/8142	0.00510558	0.00957824	0.00302027		4
hsa04137	Mitophagy - animal	3/40	72/8142	0.00518252	0.00964289	0.00304065		3
hsa04723	Retrograde endocannabinoid signaling	4/40	148/8142	0.00576419	0.010638	0.00335443		4
hsa04261	Adrenergic signaling in cardiomyocytes	4/40	150/8142	0.00604285	0.0110623	0.00348823		4
hsa04218	Cellular senescence	4/40	156/8142	0.0069326	0.0125896	0.00396983		4
hsa00790	Folate biosynthesis	2/40	26/8142	0.00709941	0.0127902	0.00403308		2
hsa05014	Amyotrophic lateral sclerosis	6/40	364/8142	0.00810868	0.0144935	0.00457017		6
hsa04976	Bile secretion	3/40	89/8142	0.00931754	0.0163885	0.0051677		3
hsa00053	Ascorbate and aldarate metabolism	2/40	30/8142	0.00938546	0.0163885	0.0051677		2
hsa01523	Antifolate resistance	2/40	30/8142	0.00938546	0.0163885	0.0051677		2
hsa04350	TGF-beta signaling pathway	3/40	94/8142	0.010814	0.0187387	0.00590879		3
hsa04713	Circadian entrainment	3/40	97/8142	0.011775	0.0202494	0.00638517		3
hsa00040	Pentose and glucuronate interconversions	2/40	34/8142	0.0119554	0.020405	0.00643423		2
hsa04916	Melanogenesis	3/40	101/8142	0.013131	0.0222444	0.00701422		3
hsa04960	Aldosterone-regulated sodium reabsorption	2/40	37/8142	0.0140622	0.0236454	0.00745599		2
hsa05202	Transcriptional misregulation in cancer	4/40	193/8142	0.0143713	0.0239874	0.00756385		4
hsa05016	Huntington disease	5/40	306/8142	0.0162444	0.026916	0.0084873		5
hsa00071	Fatty acid degradation	2/40	43/8142	0.0187171	0.0305668	0.00963848		2
hsa00860	Porphyrin metabolism	2/40	43/8142	0.0187171	0.0305668	0.00963848		2
hsa04015	Rap1 signaling pathway	4/40	210/8142	0.0190284	0.0308533	0.00972883		4
hsa00280	Valine, leucine and isoleucine degradation	2/40	48/8142	0.023024	0.037067	0.0116882		2
hsa05144	Malaria	2/40	50/8142	0.0248507	0.0397261	0.0125267		2
hsa04913	Ovarian steroidogenesis	2/40	51/8142	0.0257857	0.0409326	0.0129071		2
hsa04114	Oocyte meiosis	3/40	131/8142	0.0260841	0.0411188	0.0129658		3
hsa04270	Vascular smooth muscle contraction	3/40	134/8142	0.0276527	0.0432908	0.0136507		3
hsa04340	Hedgehog signaling pathway	2/40	56/8142	0.030671	0.0473627	0.0149347		2
hsa04923	Regulation of lipolysis in adipocytes	2/40	56/8142	0.030671	0.0473627	0.0149347		2
hsa04730	Long-term depression	2/40	60/8142	0.0348224	0.0530515	0.0167285		2
hsa05416	Viral myocarditis	2/40	60/8142	0.0348224	0.0530515	0.0167285		2
hsa04072	Phospholipase D signaling pathway	3/40	148/8142	0.0356286	0.0532526	0.0167919		3
hsa00140	Steroid hormone biosynthesis	2/40	61/8142	0.0358927	0.0532526	0.0167919		2
hsa00561	Glycerolipid metabolism	2/40	61/8142	0.0358927	0.0532526	0.0167919		2
hsa00590	Arachidonic acid metabolism	2/40	61/8142	0.0358927	0.0532526	0.0167919		2
hsa04623	Cytosolic DNA-sensing pathway	2/40	63/8142	0.0380715	0.0557564	0.0175814		2
hsa05217	Basal cell carcinoma	2/40	63/8142	0.0380715	0.0557564	0.0175814		2
hsa01240	Biosynthesis of cofactors	3/40	153/8142	0.038737	0.0563673	0.0177741		3
hsa04934	Cushing syndrome	3/40	155/8142	0.0400183	0.0578608	0.018245		3
hsa04720	Long-term potentiation	2/40	67/8142	0.0425772	0.061171	0.0192888		2
hsa04520	Adherens junction	2/40	71/8142	0.0472729	0.0674902	0.0212814		2
